# Supplementary material for: Excessive Pregestational Weight and Maternal Obstetric Complications: The Role of Adipokines
Source: MDPI journal article supplement (doi:10.3390/ijms241914678), 2023-09-28
Supplement: s1 [file s1]

**Table S1.** Prevalence of excessive weight in women from different countries. There are no data recorded for Chile, Colombia, and Costa Rica.

| Country         | Period                                                                         | Age range | Obesity | Overweight | Overweight + Obesity |
|-----------------|--------------------------------------------------------------------------------|-----------|---------|------------|----------------------|
| Mexico          | 2018-2019                                                                      | 20-39     | 32.6%   | 36.6%      | 69.2%                |
| United States   | 2017-2018                                                                      | 18-44     | 39.6%   | 25.1%      | 64.7%                |
| New Zealand     | 2019-2020                                                                      | 15-44     | 27.3%   | 27.1%      | 54.4%                |
| Slovenia        | 2019                                                                           | 18-44     | 28.0%   | 21.2%      | 49.2%                |
| Canada          | 2008                                                                           | 20-44     | 19.8%   | 25.8%      | 45.6%                |
| Australia       | 2014-2015                                                                      | 18-44     | 21.8%   | 23.2%      | 45.0%                |
| Ireland         | 2021-2022                                                                      | 15-44     | 17.3%   | 25.0%      | 42.3%                |
| Türkiye         | 2019                                                                           | 18-44     | 14.0%   | 27.6%      | 41.6%                |
| Finland         | 2019                                                                           | 18-44     | 15.2%   | 26.3%      | 41.5%                |
| Iceland         | 2014                                                                           | 18-44     | 15.7%   | 22.6%      | 38.3%                |
| Netherlands     | 2020                                                                           | 20-40     | 11.4%   | 25.3%      | 36.7%                |
| United Kingdom  | 2017                                                                           | 16-34     | 16.1%   | 20.5%      | 36.6%                |
| Hungary         | 2019                                                                           | 18-44     | 13.4%   | 20.5%      | 33.9%                |
| Norway          | 2019                                                                           | 18-44     | 10.6%   | 23.2%      | 33.8%                |
| Germany         | 2019                                                                           | 18-44     | 12.2%   | 21.3%      | 33.5%                |
| Portugal        | 2019                                                                           | 18-44     | 11.6%   | 21.5%      | 33.1%                |
| Denmark         | 2019                                                                           | 18-44     | 13.6%   | 19.3%      | 32.9%                |
| Belgium         | 2019                                                                           | 18-44     | 10.0%   | 22.8%      | 32.8%                |
| Israel          | 2014-2016                                                                      | 18-44     | 12.0%   | 20.5%      | 32.5%                |
| Sweden          | 2020                                                                           | 18-44     | 11.5%   | 21.0%      | 32.5%                |
| France          | 2019                                                                           | 18-44     | 11.3%   | 20.0%      | 31.3%                |
| Spain           | 2019                                                                           | 18-44     | 9.2%    | 21.0%      | 30.2%                |
| Czech Republic  | 2019                                                                           | 18-44     | 9.6%    | 20.5%      | 30.1%                |
| Austria         | 2019                                                                           | 18-44     | 9.6%    | 20.4%      | 30.0%                |
| Latvia          | 2019                                                                           | 18-44     | 9.0%    | 20.3%      | 29.3%                |
| Slovak Republic | 2019                                                                           | 18-44     | 7.8%    | 21.4%      | 29.2%                |
| Poland          | 2019                                                                           | 18-44     | 8.7%    | 20.3%      | 29.0%                |
| Estonia         | 2019                                                                           | 18-44     | 10.7%   | 17.3%      | 28.0%                |
| Lithuania       | 2019                                                                           | 18-44     | 9.1%    | 18.5%      | 27.6%                |
| Luxembourg      | 2019                                                                           | 18-44     | 9.4%    | 17.8%      | 27.2%                |
| Greece          | 2019                                                                           | 18-44     | 7.3%    | 18.7%      | 26.0%                |
| Italy           | 2019                                                                           | 18-44     | 5.1%    | 16.4%      | 21.5%                |
| Switzerland     | 2012. The most recent data are from 2014-2015 but are not separated by gender. | 15-44     | 5.3%    | 14.5%      | 19.8%                |
